# Supplementary material for: PACSIN2 as a modulator of autophagy and mercaptopurine cytotoxicity: mechanisms in lymphoid and intestinal cells
Source: PubMed Central journal article supplement (PMC9811133; doi:10.26508/lsa.202201610), 2023-01-03

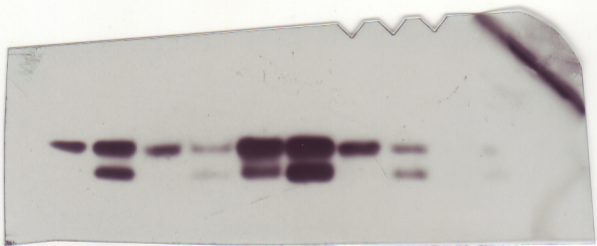

Supplement: LSA-2022-01610_SdataF3.4.pdf [file LSA-2022-01610_SdataF3.4.pdf]
